# Supplementary material for: Microbial bioconversion of food waste to bio-fertilizers
Source: Royal Society of Chemistry journal article supplement (doi:10.1039/d3fb00041a), 2024-01-01
Supplement: d3fb00041a1.pdf [file d3fb00041a1.pdf]

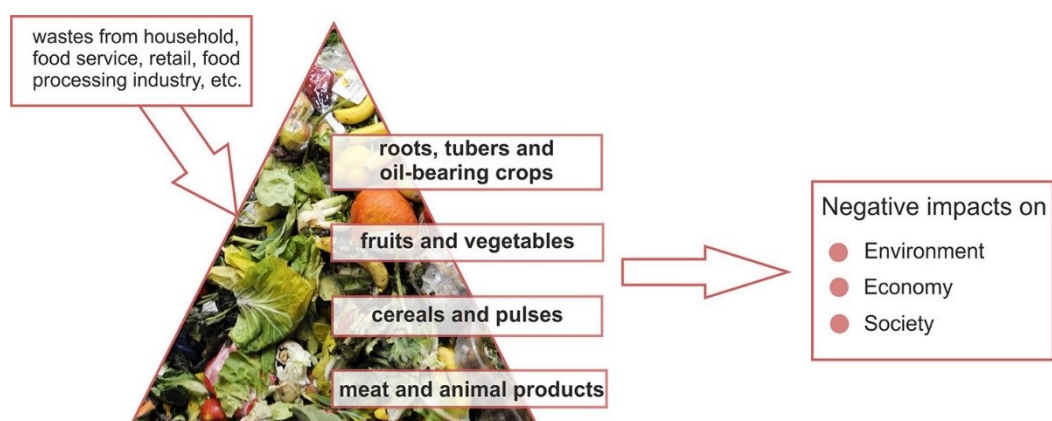

**Fig.:** Main food wastes, their source and undesirable impacts [Copyright @ 2022 American Chemical Society from Capanoglu et al., 2022].
